# Supplementary material for: A tin-based composite oxide confined by reduced graphene oxide as a high-rate anode for sodium-ion capacitors
Source: Royal Society of Chemistry journal article supplement (doi:10.1039/d4ta08656b), 2025-01-01
Supplement: d4ta08656b1.pdf [file d4ta08656b1.pdf]

## **Tin-Based Composite Oxide Confined by Reduced Graphene Oxide as a High-Rate Anode for Sodium-Ion Capacitors**

Yongmei Sun<sup>a,b</sup>, Qingwen Fan<sup>a</sup>, Chaoyun Song<sup>c</sup>, Hailin Cong<sup>d</sup>, Sanwei Hao<sup>d</sup>, Mei Ma<sup>b\*</sup>, and Peng Fu<sup>a\*</sup>

<sup>a</sup>College of Agricultural Engineering and Food Science, Shandong University of Technology, Zibo 255000, P. R. China.

<sup>b</sup>School of Chemistry and Chemical Engineering, Shandong University of Technology, Zibo 255000, P. R. China.

<sup>c</sup>Department of Engineering, Strand Campus, King's College London, London, WC2R 2LS, United Kingdom.

<sup>d</sup>School of Materials Science and Engineering, Shandong University of Technology, Zibo 255000, Shandong, China

\*Corresponding Authors.

Email addresses: mamei@sdut.edu.cn, fupengsdut@163.com

**Table S1.** Comparison of XRD Peak FWHM and Crystallite Size between  $\text{Sn}_2\text{P}_2\text{O}_7$  and  $\text{Sn}_2\text{P}_2\text{O}_7/\text{rGO}$

| Peak Position<br>( $2\theta$ ) | FWHM ( $^\circ$ )<br>$\text{Sn}_2\text{P}_2\text{O}_7$ | FWHM ( $^\circ$ )<br>$\text{Sn}_2\text{P}_2\text{O}_7/\text{rGO}$ | Crystallite Size (nm)<br>$\text{Sn}_2\text{P}_2\text{O}_7$ | Crystallite Size (nm)<br>$\text{Sn}_2\text{P}_2\text{O}_7/\text{rGO}$ |
|--------------------------------|--------------------------------------------------------|-------------------------------------------------------------------|------------------------------------------------------------|-----------------------------------------------------------------------|
| 20.2666                        | 0.0513                                                 | 0.0107                                                            | 155.6697                                                   |                                                                       |
| 20.4805                        | 0.0182                                                 | 0.5395                                                            |                                                            | 14.7986                                                               |
| 21.3751                        | 0.0129                                                 | 0.0156                                                            |                                                            |                                                                       |
| 21.6668                        | 0.0113                                                 | 0.2683                                                            |                                                            | 29.8116                                                               |
| 31.2935                        | 0.2282                                                 | 0.3082                                                            |                                                            |                                                                       |
| 36.0582                        | 0.2622                                                 | 0.0194                                                            | 31.5136                                                    |                                                                       |
| 36.0971                        | 0.0160                                                 | 0.3171                                                            |                                                            |                                                                       |

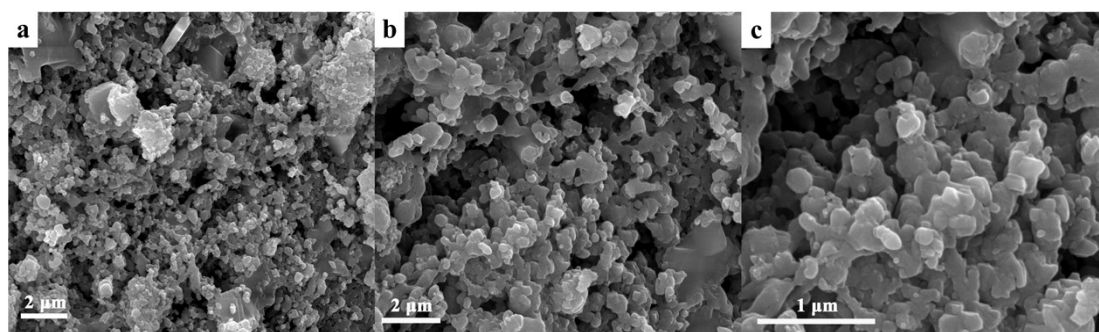

**Figure S1.** SEM images of  $\text{Sn}_2\text{P}_2\text{O}_7$ .

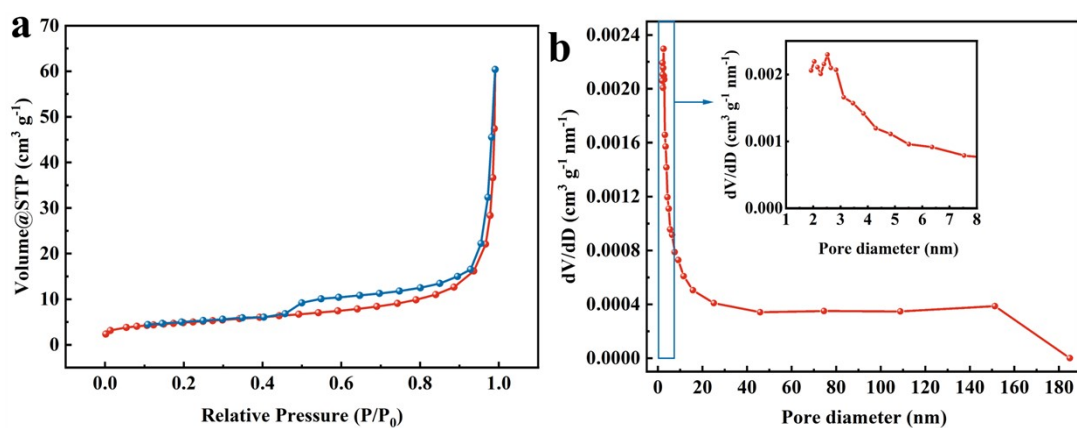

**Figure S2.**  $\text{N}_2$  adsorption-desorption isotherms and corresponding pore size distribution plot of  $\text{Sn}_2\text{P}_2\text{O}_7/\text{rGO}$ .

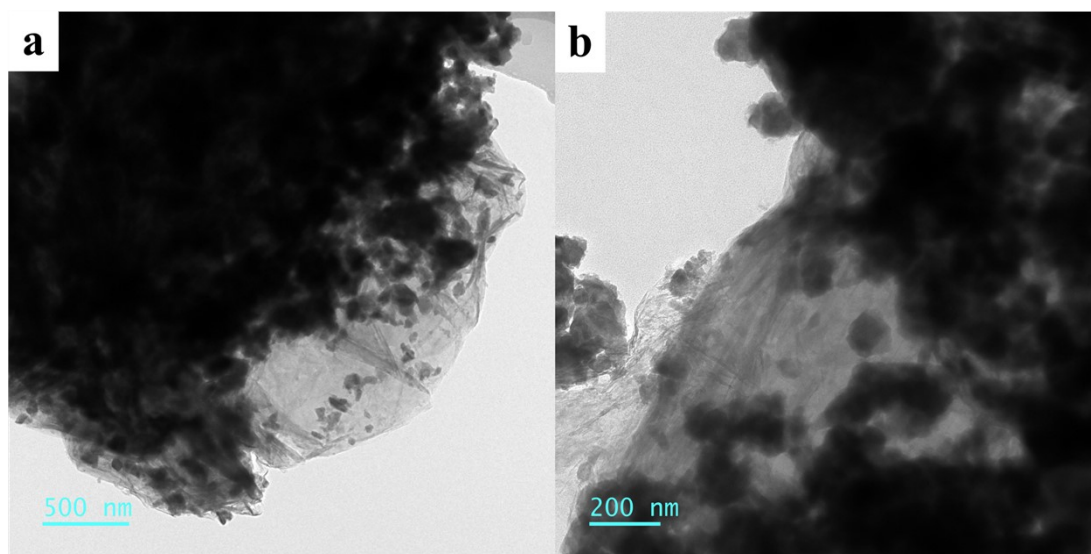

**Figure S3.** TEM images of  $\text{Sn}_2\text{P}_2\text{O}_7/\text{rGO}$  composite.

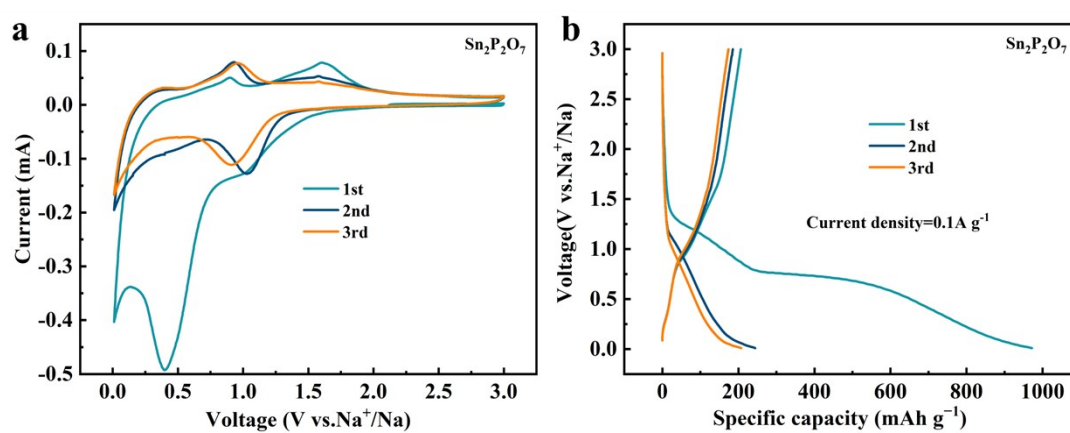

**Figure S4.** (a) CV curves at a scan rate of  $0.1 \text{ mV s}^{-1}$  of  $\text{Sn}_2\text{P}_2\text{O}_7$  anode. (b) Charge/discharge profiles of the first three cycles at the current density of  $0.1 \text{ A g}^{-1}$  of  $\text{Sn}_2\text{P}_2\text{O}_7$  anode.

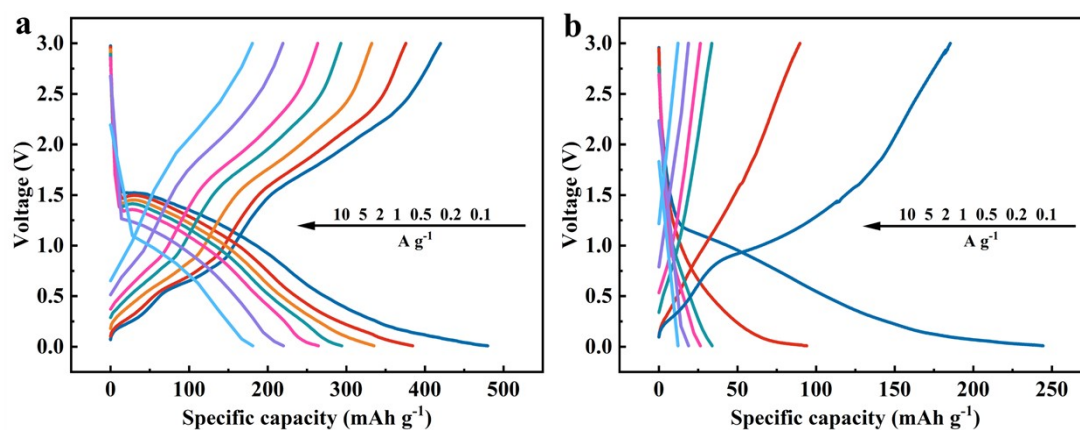

**Figure S5.** Discharge/charge profiles of (a)  $\text{Sn}_2\text{P}_2\text{O}_7/\text{rGO}$  and (b)  $\text{Sn}_2\text{P}_2\text{O}_7$  anodes at different current densities from 0.1 to 10  $\text{A g}^{-1}$ .

**Table S2.** Comparison of rate performance of Sn-based compound/carbon composite anode for SIBs.

| Anode materials                                                | Specific capacity/current density<br>( $\text{mA h g}^{-1}/\text{A g}^{-1}$ ) | Ref.             |
|----------------------------------------------------------------|-------------------------------------------------------------------------------|------------------|
| $\text{Sn}_2\text{P}_2\text{O}_7/\text{RGO}$                   | (480/0.05) (170/10)                                                           | [1]              |
| $\text{SnP}_2\text{O}_7/\text{rGO}$                            | (254.7/0.1) (91.1/10)                                                         | [2]              |
| $\text{SnP}_2\text{O}_7@\text{N-C}$                            | (400/0.1) (210/5)                                                             | [3]              |
| $\text{SnP}_2\text{O}_7/\text{NG}$                             | (423/0.1) (206/2)                                                             | [4]              |
| $\text{SnP}_2\text{O}_7@\text{C}$                              | (403/0.2) (110/2)                                                             | [5]              |
| $\text{SnP}_2\text{O}_7@\text{C/CN}$                           | (342.3/0.1) (106.0/5)                                                         | [6]              |
| <b><math>\text{Sn}_2\text{P}_2\text{O}_7/\text{rGO}</math></b> | <b>(433.3/0.1) (185.7/10)</b>                                                 | <b>This work</b> |

**Table S3.** Comparison of cycling stability of Sn-based anode materials for SIBs.

| Anode materials                                     | Capacity<br>(mA h g <sup>-1</sup> /A g <sup>-1</sup> ) | Cycle life. | Ref.             |
|-----------------------------------------------------|--------------------------------------------------------|-------------|------------------|
| SnP <sub>2</sub> O <sub>7</sub> @C/CN               | 91.5/2                                                 | 800         | [6]              |
| SnS-AB                                              | 290/0.1                                                | 50          | [7]              |
| Sn/Sb@SSO@PCFs                                      | 440/0.05                                               | 450         | [8]              |
| Sn <sub>4</sub> P <sub>3</sub> @CNF                 | 336/1                                                  | 500         | [9]              |
| Sn <sub>3</sub> Se <sub>5</sub> @PPy                | 187.8/5                                                | 300         | [10]             |
| Sn-Ni@NC                                            | 150.3/1                                                | 200         | [11]             |
| <b>Sn<sub>2</sub>P<sub>2</sub>O<sub>7</sub>/rGO</b> | <b>165.4/1</b>                                         | <b>1000</b> | <b>This work</b> |

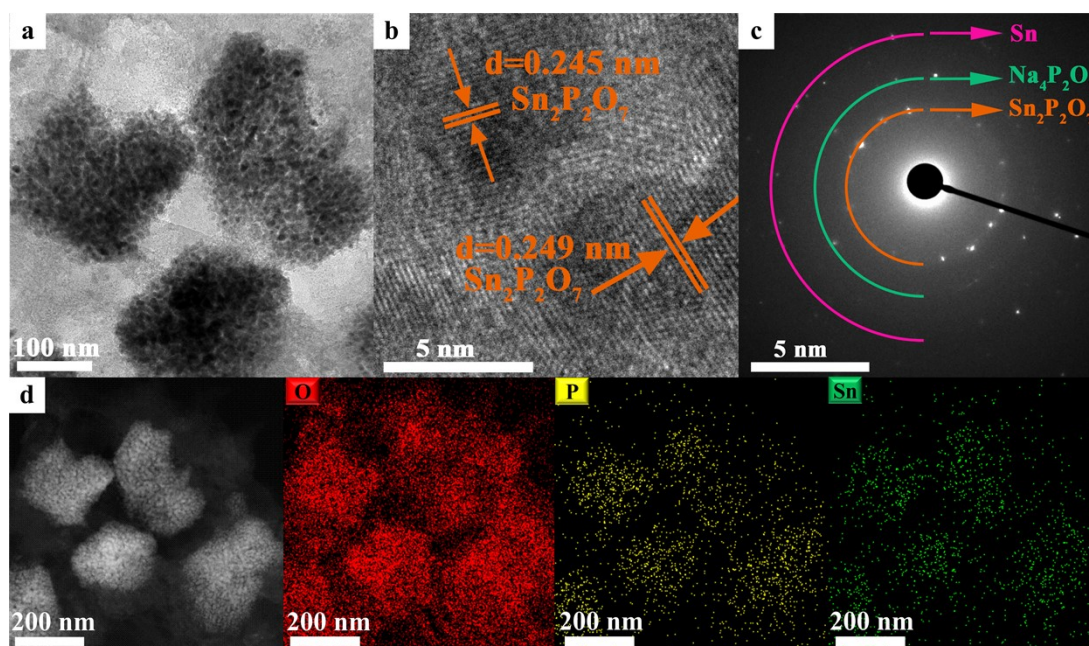

**Figure S6.** (a) *Ex-situ* TEM images, (b) HRTEM images, (c) SAED patterns and (d) EDS elemental mappings of Sn<sub>2</sub>P<sub>2</sub>O<sub>7</sub> anode after 1000 cycles at a current density of 1 A g<sup>-1</sup>.

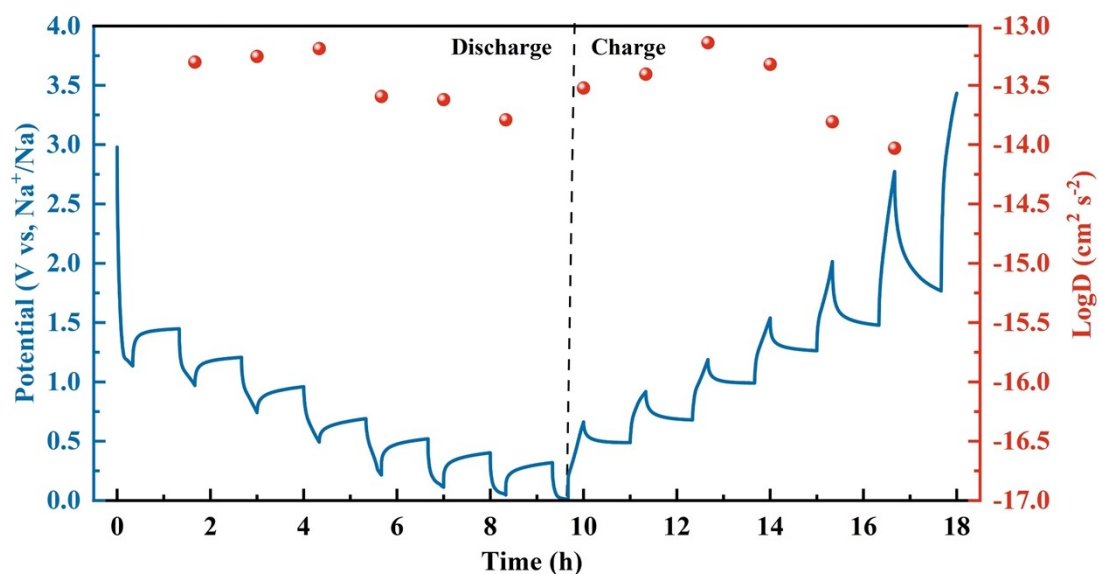

**Figure S7.** GITT curve and diffusivity versus state of discharge and charge during the selected second cycle of  $\text{Sn}_2\text{P}_2\text{O}_7$  anode. (The  $D_{\text{Na}^+}$  of  $\text{Sn}_2\text{P}_2\text{O}_7$  anode ranges from  $1 \times 10^{-13.19} \text{ cm}^2 \text{ s}^{-1}$  to  $1 \times 10^{-13.79} \text{ cm}^2 \text{ s}^{-1}$  during discharge process, and from  $1 \times 10^{-13.14} \text{ cm}^2 \text{ s}^{-1}$  to  $1 \times 10^{-14.03} \text{ cm}^2 \text{ s}^{-1}$  during charge process.)

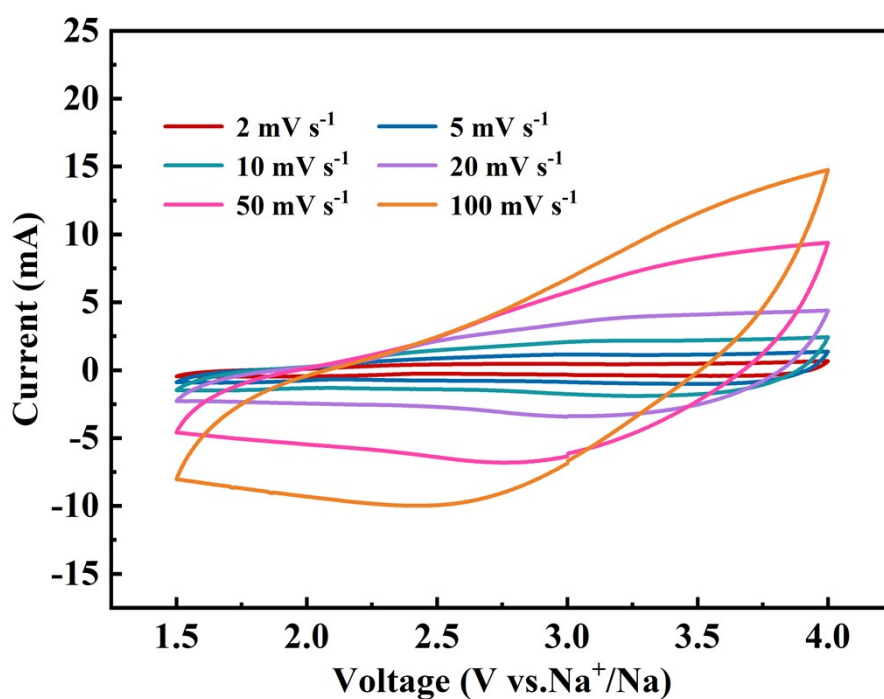

**Figure S8.** Half-cell performance of the AC vs. Na metal, tested between 1.5–4.0 V. CV curves at different scan rates from  $2 \text{ mV s}^{-1}$  to  $100 \text{ mV s}^{-1}$ .

## References

- 1 X. Yang, R. Y. Zhang, J. Zhao, Z. X. Wei, D. X. Wang, X. F. Bie, Y. Gao, J. Wang, F. Du and G. Chen, *Adv. Energy Mater.*, 2017, **8**.
- 2 J. Pan, S. Chen, D. Zhang, X. Xu, Y. Sun, F. Tian, P. Gao and J. Yang, *Adv. Funct. Mater.*, 2018, **28**.
- 3 S. Mu, Q. Liu, P. Kidkhunthod, X. Zhou, W. Wang and Y. Tang, *Natl. Sci. Rev.*, 2020.
- 4 L. Bai, X. Pang, Y. Sun, X. Zhang and J. Guo, *J. Alloys Compd.*, 2021, **854**.
- 5 W. He, K. Chen, R. Pathak, M. Hummel, B. S. Lamsal, Z. Gu, P. Kharel, J. J. Wu and Y. Zhou, *ACS Appl. Mater. Interfaces*, 2021, **13**, 22577-22585.
- 6 X. Guo, Z. Wan, D. Wei, X. Zeng, Z. Li, W. Jiang, H. Wang, M. Ling, H. Li and C. Liang, *ChemElectroChem*, 2021, **8**, 2708-2714.
- 7 W. Wang, L. Shi, D. Lan and Q. Li, *J. Power Sources*, 2018, **377**, 1-6.
- 8 X. Chen, N. Zhang, P. He and X. Ding, *J. Alloys Compd.*, 2023, **938**, 168472.
- 9 L. Ran, I. Gentle, T. Lin, B. Luo, N. Mo, M. Rana, M. Li, L. Wang and R. Knibbe, *J. Power Sources*, 2020, **461**, 228116.
- 10 L.-b. Tang, P. Yang, Y.-j. Chen, P.-y. Li, T. Peng, H.-X. Wei, Z. Wang, Z.-j. He, C. Yan, J. Mao, K. Dai, Y. Cheng, L.-M. Gao and J.-c. Zheng, *J. Power Sources*, 2022, **552**, 232210.
- 11 H. Li, Y. He, X. Li, J. Yu, X. Sun, T. Gao and G. Zhou, *Applied Surface Science*, 2023, **611**, 155672.
